# Supplementary material for: Formation of extraordinarily large nanosheets from K4Nb6O17 crystalsElectronic supplementary information (ESI) available: powder XRD patterns of the slurries, AFM image of the sample in the supernatant, image of K4Nb6O17 crystals. See http://www.rsc.org/suppdata/cc/b2/b206998a/
Source: Royal Society of Chemistry journal article supplement (doi:10.1039/b206998a), 2002-09-18
Supplement: b206998a.pdf [file b206998a.pdf]

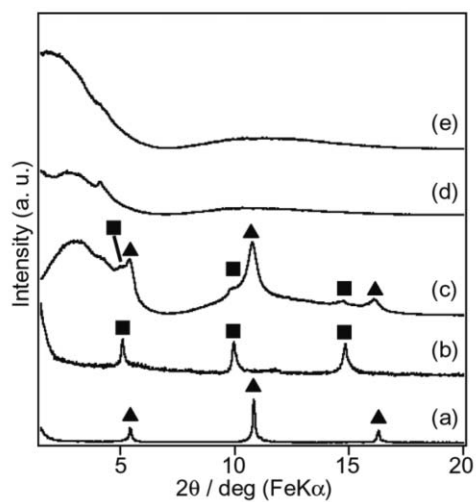

**Fig. S1** Variation in the powder XRD patterns of the slurries with the reaction time. (a)  $\text{K}_4\text{Nb}_6\text{O}_{17} \cdot 4.5\text{H}_2\text{O}$ , (b)  $\text{PA-K}_x\text{Nb}_6\text{O}_{17}$ , (c) the reaction product after the hydrothermal treatment for 1 d, (d) the product for 2 d, and (e) the product for 3 d. After the hydrothermal treatment for 1 d, a broad peak at lower than  $5^\circ$  was observed as well as those due to  $\text{K}_4\text{Nb}_6\text{O}_{17} \cdot 4.5\text{H}_2\text{O}$  ( $\blacktriangle$  = 2.06 nm, 1.03 nm, and 0.69 nm) and the  $\text{PA-K}_x\text{Nb}_6\text{O}_{17}$  intercalation compound ( $\blacksquare$  = 2.21 nm, 1.12 nm, and 0.76 nm).

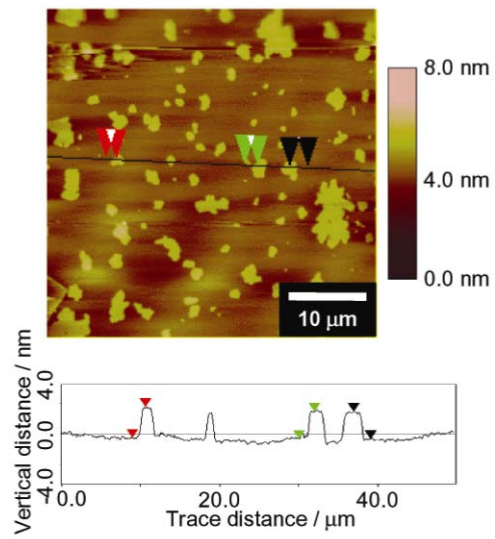

**Fig. S2** AFM image of the sample in the supernatant

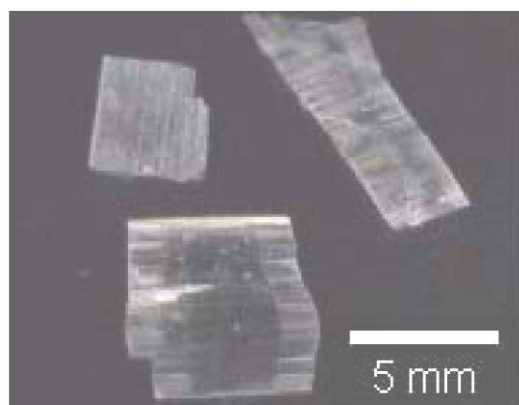

**Fig. S3**  $K_4Nb_6O_{17}$  Crystals
